# Supplementary material for: Machine Learning for Prediction of Survival Outcomes with Immune-Checkpoint Inhibitors in Urothelial Cancer
Source: MDPI journal article supplement (doi:10.3390/cancers13092001), 2021-04-21
Supplement: s1 [file s1]

# Supplementary Materials: Machine Learning for Prediction of Survival Outcomes with Immune Check Point Inhibitors in Urothelial Cancer

Ahmad Y. Abuhelwa, Ross A. McKinnon, Andrew Rowland, Ashley M. Hopkins and Michael J. Sorich

Table S1: Pre-treatment patient characteristics by atezolizumab study cohort.

| Variable                                                    | Total<br>No. = 896 | IMvigor210<br>No. = 429 | IMvigor210<br>No. = 467 | <i>p</i> -<br>value |
|-------------------------------------------------------------|--------------------|-------------------------|-------------------------|---------------------|
| PD-L1 tumor cell expression level                           |                    |                         |                         | 0.009               |
| 0                                                           | 688 (77%)          | 347 (81%)               | 341 (73%)               |                     |
| 1                                                           | 80 (9%)            | 30 (7%)                 | 50 (11%)                |                     |
| 2                                                           | 102 (11%)          | 38 (9%)                 | 64 (14%)                |                     |
| 3                                                           | 26 (3%)            | 14 (3%)                 | 12 (3%)                 |                     |
| Aspartate Aminotransferase (U/L)                            |                    |                         |                         | 0.80                |
| Median (IQR)                                                | 21 (16–26)         | 21 (16–27)              | 20 (16–26)              |                     |
| Missing                                                     | 33 (4%)            | 12 (3%)                 | 21 (4%)                 |                     |
| Alanine Aminotransferase (U/L)                              |                    |                         |                         | 0.002               |
| Median (IQR)                                                | 18 (13–26)         | 19 (14–28)              | 17 (12–25)              |                     |
| Missing                                                     | 35 (4%)            | 15 (3%)                 | 20 (4%)                 |                     |
| Bilirubin (μmol/L)                                          |                    |                         |                         | 0.054               |
| Median (IQR)                                                | 6.8 (5.1–9.0)      | 6.8 (5.1–10.3)          | 6.8 (5.1–8.6)           |                     |
| Missing                                                     | 34 (3.8%)          | 13 (3.0%)               | 21 (4.5%)               |                     |
| Neutrophils (10 <sup>9</sup> /L)                            |                    |                         |                         | 0.63                |
| Median (IQR)                                                | 4.9 (3.7–6.5)      | 4.9 (3.8–6.5)           | 4.9 (3.6–6.6)           |                     |
| Missing                                                     | 29 (3.2%)          | 11 (2.6%)               | 18 (3.9%)               |                     |
| Eosinophils (10 <sup>9</sup> /L)                            |                    |                         |                         | 0.011               |
| Median (IQR)                                                | 0.15 (0.10–0.23)   | 0.17 (0.10–0.25)        | 0.13 (0.10–0.21)        |                     |
| Missing                                                     | 92 (10.27%)        | 46 (10.72%)             | 46 (9.85%)              |                     |
| Lymphocyte to monocyte ratio (10 <sup>9</sup> /L)           |                    |                         |                         | 0.002               |
| Median (IQR)                                                | 2.1 (1.4–3.0)      | 2.0 (1.3–2.8)           | 2.3 (1.5–3.0)           |                     |
| Missing                                                     | 33 (3.7%)          | 12 (2.8%)               | 21 (4.5%)               |                     |
| Derived neutrophil to lymphocyte ratio (10 <sup>9</sup> /L) |                    |                         |                         | 0.038               |
| Median (IQR)                                                | 2.3 (1.7–3.1)      | 2.3 (1.8–3.2)           | 2.2 (1.7–3.0)           |                     |
| Missing                                                     | 34 (3.8%)          | 14 (3.3%)               | 20 (4.3%)               |                     |
| Platelet to lymphocyte ratio (10 <sup>9</sup> /L)           |                    |                         |                         | 0.006               |
| Median (IQR)                                                | 193 (137–279)      | 204 (142–291)           | 182 (131–262)           |                     |
| Missing                                                     | 37 (4%)            | 15 (3%)                 | 22 (5%)                 |                     |
| Hemoglobin to platelet ratio (g/L)                          |                    |                         |                         | 0.65                |
| Median (IQR)                                                | 0.49 (0.36–0.64)   | 0.49 (0.36–0.66)        | 0.51 (0.37–0.63)        |                     |
| Missing                                                     | 27 (3.01%)         | 11 (2.56%)              | 16 (3.43%)              |                     |
| Protein (g/L)                                               |                    |                         |                         | 0.004               |
| Median (IQR)                                                | 72 (68–76)         | 71 (67–75)              | 73 (69–76)              |                     |
| Missing                                                     | 38 (4%)            | 15 (3%)                 | 23 (5%)                 |                     |

|                                                  |                  |                  |                  |        |
|--------------------------------------------------|------------------|------------------|------------------|--------|
| Brain tumor site at baseline                     | 8 (1%)           | 8 (2%)           | 0 (0%)           | 0.009  |
| Bone tumor site at baseline                      | 185 (21%)        | 75 (17%)         | 110 (24%)        | 0.031  |
| Lung tumor site at baseline                      | 359 (40%)        | 174 (41%)        | 185 (40%)        | 0.83   |
| Visceral tumor site                              | 682 (76%)        | 321 (75%)        | 361 (77%)        | 0.43   |
| Estimated glomerular filtration rate (mL/min)    |                  |                  |                  | 0.047  |
| Median (IQR)                                     | 64 (50–81)       | 62 (47–80)       | 66 (51–82)       |        |
| Missing                                          | 43 (5%)          | 16 (4%)          | 27 (6%)          |        |
| Creatinine (µmol/L)                              |                  |                  |                  | <0.001 |
| Median (IQR)                                     | 103 (87–126)     | 107 (88–133)     | 100 (84–121)     |        |
| Missing                                          | 30 (3%)          | 12 (3%)          | 18 (4%)          |        |
| Blood Urea Nitrogen (mmol/L)                     |                  |                  |                  | 0.020  |
| Median (IQR)                                     | 7.1 (5.7–9.0)    | 7.5 (5.8–9.3)    | 6.8 (5.7–8.6)    |        |
| Missing                                          | 51 (5.7%)        | 15 (3.5%)        | 36 (7.7%)        |        |
| Months from metastatic diagnosis (months)        |                  |                  |                  | 0.20   |
| Median (IQR)                                     | 9.2 (3.8–16.7)   | 8.6 (3.3–17.4)   | 9.9 (5.0–16.5)   |        |
| Missing                                          | 80 (8.9%)        | 30 (7.0%)        | 50 (10.7%)       |        |
| Histology                                        |                  |                  |                  | 0.68   |
| Transitional cell carcinoma                      | 811 (91%)        | 386 (90%)        | 425 (91%)        |        |
| Transitional cell carcinoma with mixed histology | 85 (9%)          | 43 (10%)         | 42 (9%)          |        |
| Prior cystectomy                                 | 355 (40%)        | 156 (36%)        | 199 (43%)        | 0.065  |
| Sodium (mmol/L)                                  |                  |                  |                  | 0.31   |
| Median (IQR)                                     | 139 (136–141)    | 138 (136–141)    | 139 (137–141)    |        |
| Missing                                          | 28 (3%)          | 11 (3%)          | 17 (4%)          |        |
| Calcium (mmol/L)                                 |                  |                  |                  | 0.24   |
| Median (IQR)                                     | 2.4 (2.3–2.4)    | 2.4 (2.2–2.4)    | 2.4 (2.3–2.4)    |        |
| Missing                                          | 30 (3.3%)        | 11 (2.6%)        | 19 (4.1%)        |        |
| Potassium (mmol/L)                               |                  |                  |                  | 0.074  |
| Median (IQR)                                     | 4.4 (4.1–4.7)    | 4.3 (4.1–4.6)    | 4.4 (4.1–4.7)    |        |
| Missing                                          | 28 (3.1%)        | 11 (2.6%)        | 17 (3.6%)        |        |
| Magnesium (mmol/L)                               |                  |                  |                  | 0.47   |
| Median (IQR)                                     | 0.82 (0.74–0.88) | 0.82 (0.74–0.89) | 0.82 (0.74–0.87) |        |
| Missing                                          | 58 (6.47%)       | 27 (6.29%)       | 31 (6.64%)       |        |
| Chloride (mmol/L)                                |                  |                  |                  | 0.58   |
| Median (IQR)                                     | 102 (99–104)     | 102 (99–105)     | 102 (99–104)     |        |
| Missing                                          | 41 (5%)          | 14 (3%)          | 27 (6%)          |        |
| Phosphate (mmol/L)                               |                  |                  |                  | <0.001 |
| Median (IQR)                                     | 1.1 (0.9–1.2)    | 1.1 (0.9–1.2)    | 1.0 (0.9–1.2)    |        |
| Missing                                          | 54 (6.0%)        | 30 (7.0%)        | 24 (5.1%)        |        |
| Steroids (Y/N)                                   | 67 (7%)          | 40 (9%)          | 27 (6%)          | 0.059  |
| Opioid (Y/N)                                     | 344 (38%)        | 176 (41%)        | 168 (36%)        | 0.14   |
| NSAIDS (Y/N)                                     | 272 (30%)        | 141 (33%)        | 131 (28%)        | 0.14   |
| Antibiotics 60 day PRE (Y/N)                     | 70 (8%)          | 34 (8%)          | 36 (8%)          | 1.0    |
| Proton pump inhibitors (Y/N)                     | 241 (27%)        | 122 (28%)        | 119 (25%)        | 0.36   |
| Paracetamol (Y/N)                                | 287 (32%)        | 138 (32%)        | 149 (32%)        | 0.99   |
| Laxatives or stool softeners (Y/N)               | 220 (25%)        | 128 (30%)        | 92 (20%)         | <0.001 |
| Statins (Y/N)                                    | 215 (24%)        | 129 (30%)        | 86 (18%)         | <0.001 |
| Betablockers (Y/N)                               | 171 (19%)        | 101 (24%)        | 70 (15%)         | 0.002  |
| Vitamines and minerals                           | 190 (21%)        | 149 (35%)        | 41 (9%)          | <0.001 |
| Calcium channel blockers (Y/N)                   | 141 (16%)        | 79 (18%)         | 62 (13%)         | 0.044  |

|                                                                               |           |           |           |         |
|-------------------------------------------------------------------------------|-----------|-----------|-----------|---------|
| Anticoagulants (Y/N)                                                          | 131 (15%) | 70 (16%)  | 61 (13%)  | 0.20    |
| Bone modulating agents (Y/N)                                                  | 6 (1%)    | 4 (1%)    | 2 (<1%)   | 0.61    |
| Insomnia (Y/N)                                                                | 122 (14%) | 70 (16%)  | 52 (11%)  | 0.031   |
| Diabetes (all types) (Y/N)                                                    | 138 (15%) | 75 (17%)  | 63 (13%)  | 0.12    |
| Anemia (Y/N)                                                                  | 159 (18%) | 93 (22%)  | 66 (14%)  | 0.004   |
| Pain and discomfort (Y/N)                                                     | 453 (51%) | 231 (54%) | 222 (48%) | 0.069   |
| Vascular hypertension (Y/N)                                                   | 452 (50%) | 249 (58%) | 203 (43%) | <0.001  |
| Lipids metabolism disorders (elevated TG, Cholesterol, Hyperlipidemias) (Y/N) | 249 (28%) | 153 (36%) | 96 (21%)  | <0.001  |
| Fatigue (Y/N)                                                                 | 228 (25%) | 150 (35%) | 78 (17%)  | < 0.001 |
| Constipation (Y/N)                                                            | 212 (24%) | 123 (29%) | 89 (19%)  | <0.001  |
| Renal failure and impairment (Y/N)                                            | 103 (11%) | 70 (16%)  | 33 (7%)   | <0.001  |
| Urinary tract signs and symptom (Y/N)                                         | 106 (12%) | 67 (16%)  | 39 (8%)   | 0.001   |
| Musculoskeletal pain (Y/N)                                                    | 216 (24%) | 126 (29%) | 90 (19%)  | <0.001  |
| Gastrointestinal and abdominal pain (excluding oral/throat) (Y/N)             | 79 (9%)   | 46 (11%)  | 33 (7%)   | 0.070   |

Data are median (IQR) or number of patients (%). *p* values per Chi-Square test for categorical data and Kruskal-Wallis test for continuous data.

**Table S2.** Hyperparameter tuning of machine learning algorithms on overall survival data using the primary and extended lists.

| ML Method                 | Parameter         | Description                                                                      | Search Space                                      | Optimal Model / Parameter Value |                |
|---------------------------|-------------------|----------------------------------------------------------------------------------|---------------------------------------------------|---------------------------------|----------------|
|                           |                   |                                                                                  |                                                   | Curated List                    | Uncurated List |
| Decision tree             | teststat          | The type of the test statistic to be applied for variable selection.             | quadratic, maximum                                | 'quadratic'                     | 'quadratic'    |
|                           | testtype          | Method to compute the distribution of the test statistic.                        | Bonferroni, MonteCarlo, Univariate, Teststatistic | 'MonteCarlo'                    | 'Bonferroni'   |
| Random forest             | maxdepth          | Maximum depth of the tree.                                                       | 5,10,15,20                                        | 15                              | 5              |
|                           | ntree             | number of trees in the forest                                                    | 1000,2000,3000                                    | 2000                            | 1000           |
|                           | mtry              | Number of variables randomly selected for splitting at each node.                | 4,5,6,8,10                                        | 4                               | 4              |
|                           | nodesize          | Minimum size of terminal nodes.                                                  | 5,10,15,20                                        | 5                               | 15             |
|                           | nsplit            | Number of randomly selected split points.                                        | 5,10,15,20                                        | 5                               | 5              |
|                           | Shrinkage         | Learning rate                                                                    | 0.001–0.1, by = 0.001                             | 0.001                           | 0.001          |
| Gradient boosted machine  | n.trees           | Number of boosted trees                                                          | 3000,4000,5000,6000                               | 3000                            | 4000           |
|                           | Interaction.depth | Maximum depth of each tree                                                       | 3,6,10                                            | 3                               | 3              |
|                           | n.minobsinnode    | Minimum number of observations in the terminal nodes of the trees.               | 2–14, by = 2                                      | 8                               | 10             |
|                           | bag.fraction      | Fraction of training set randomly selected to propose the next tree in expansion | 0.5,0.8,1                                         | 0.5                             | 0.5            |
| Cox boosted model         | Stepno            | Number of boosting steps                                                         | 50–200, by = 5                                    | 115                             | 70             |
| Generalized linear models | alpha             | The elastic net mixing parameter                                                 | 0,0.5,1                                           | 0                               | 0              |

**Table S3.** Discrimination performance on IMvigor210 training cohort for overall survival and progression free survival.

| Learner                  | Overall Survival             |                                | Progression Free Survival    |                                |
|--------------------------|------------------------------|--------------------------------|------------------------------|--------------------------------|
|                          | Curated List<br>C-Statistics | Uncurated List<br>C-Statistics | Curated List<br>C-Statistics | Uncurated List<br>C-Statistics |
| Gradient boosted machine | 0.81                         | 0.84                           | 0.70                         | 0.72                           |
| Random Forest            | 0.88                         | 0.83                           | 0.73                         | 0.71                           |
| Cox Boosted model        | 0.77                         | 0.77                           | 0.67                         | 0.67                           |
| Generalized linear model | 0.77                         | 0.77                           | 0.68                         | 0.68                           |

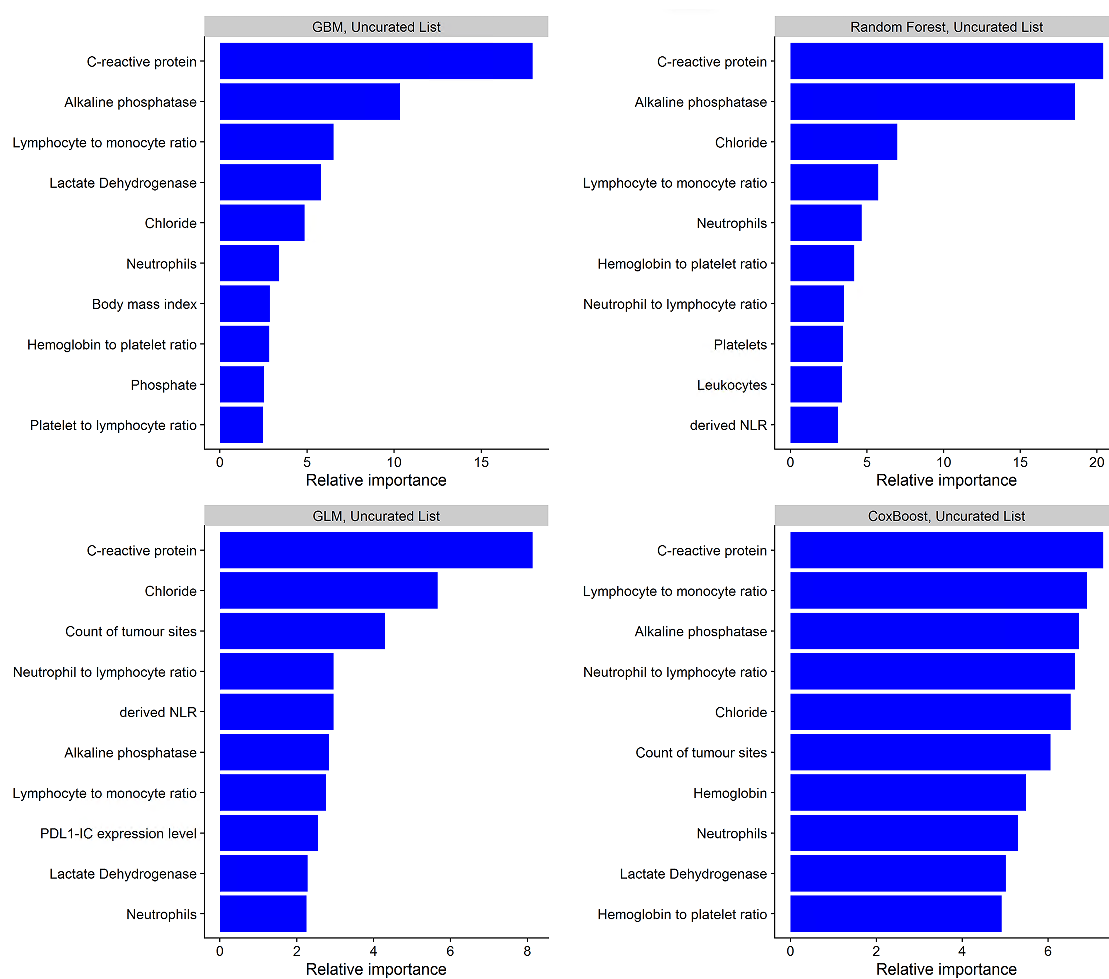**Figure S1.** Relative importance of the top 10 variables for predicting survival using the uncurated variable list. GBM: gradient boosted machine, GLM: generalized linear model with regularization.

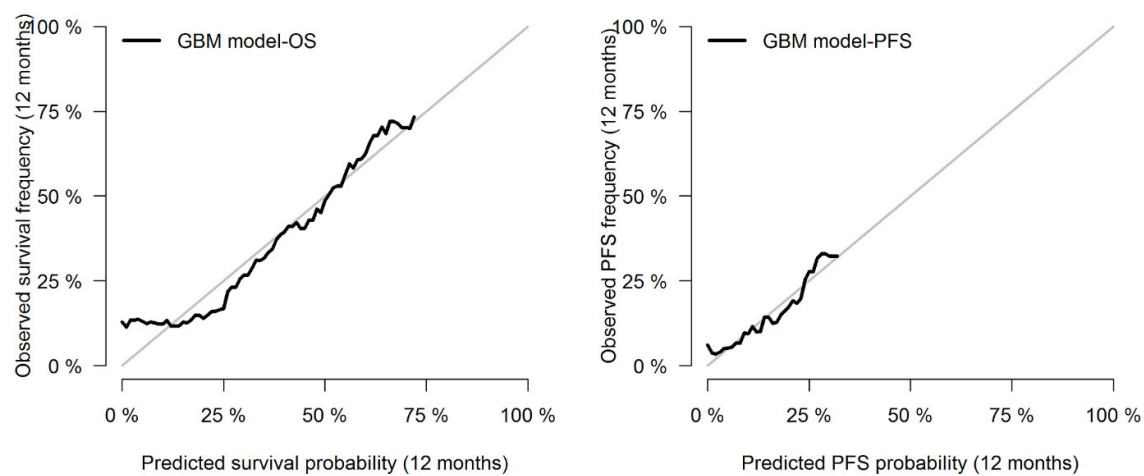

**Figure S2.** Calibration plots (Kaplan-Meier observed versus model predicted probabilities) of overall survival (OS) and progression free survival (PFS) on validation data using the GBM model constructed using curated variables list.
